# Supplementary material for: A solution processed metal–oxo cluster for rewritable resistive memory devices
Source: Royal Society of Chemistry journal article supplement (doi:10.1039/c8tc05188g), 2018-12-03
Supplement: c8tc05188g1.pdf [file c8tc05188g1.pdf]

## Supplementary Information

# Solution processed metal oxo cluster for rewritable resistive memories

Kui Zhou,<sup>a,b</sup> Guanglong Ding,<sup>a</sup> Chen Zhang,<sup>a</sup> Ziyu Lv,<sup>a</sup> Shenghuang Luo,<sup>c</sup> Ye Zhou,<sup>\*c</sup> Li Zhou,<sup>a</sup> Xiaoli Chen,<sup>a</sup> Huilin Li<sup>a</sup> and Su-Ting Han<sup>\*a</sup>

<sup>a</sup>Shenzhen Key Laboratory of Flexible Memory Materials and Devices, College of Electronic Science and Technology, Shenzhen University, 518060, P. R. China.

<sup>b</sup>Key Laboratory of Optoelectronic Devices and Systems of Ministry of Education and Guangdong Province, College of Optoelectronic Engineering, Shenzhen University, 518060, P. R. China.

<sup>c</sup>Institute for Advanced Study, Shenzhen University, 518060, P. R. China.

\*Email - netzhouye@hotmail.com

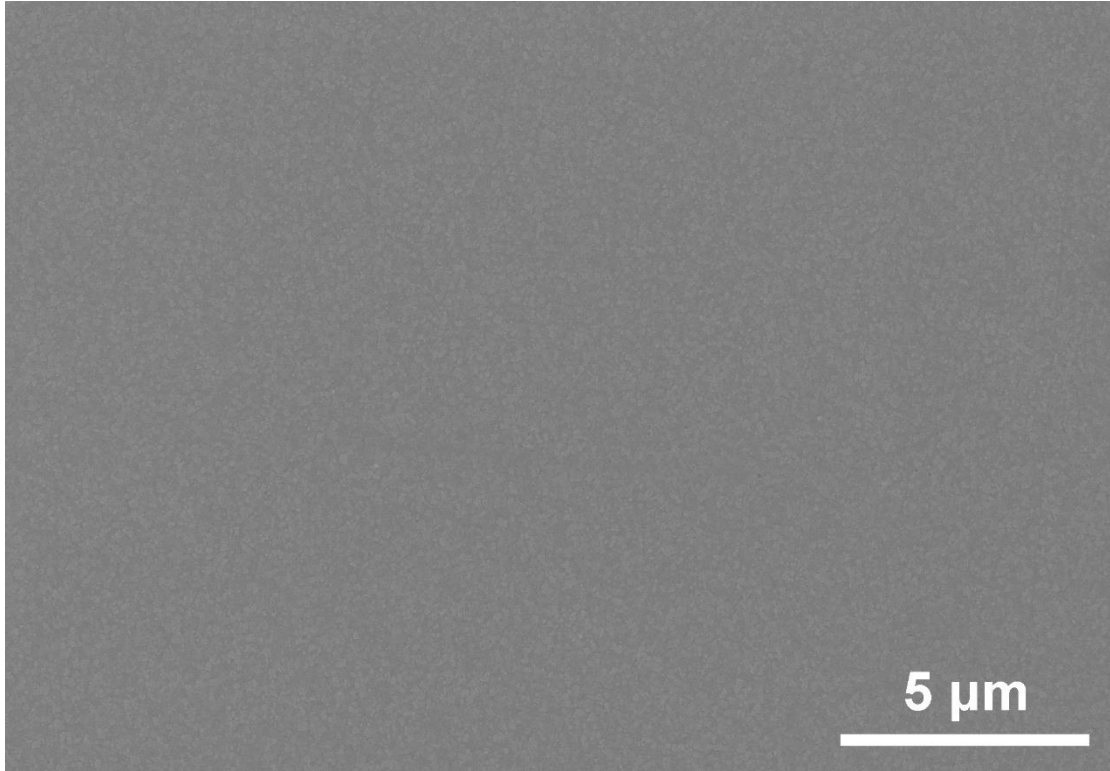

**Figure S1.** SEM of BiON NCs film on ITO glass.

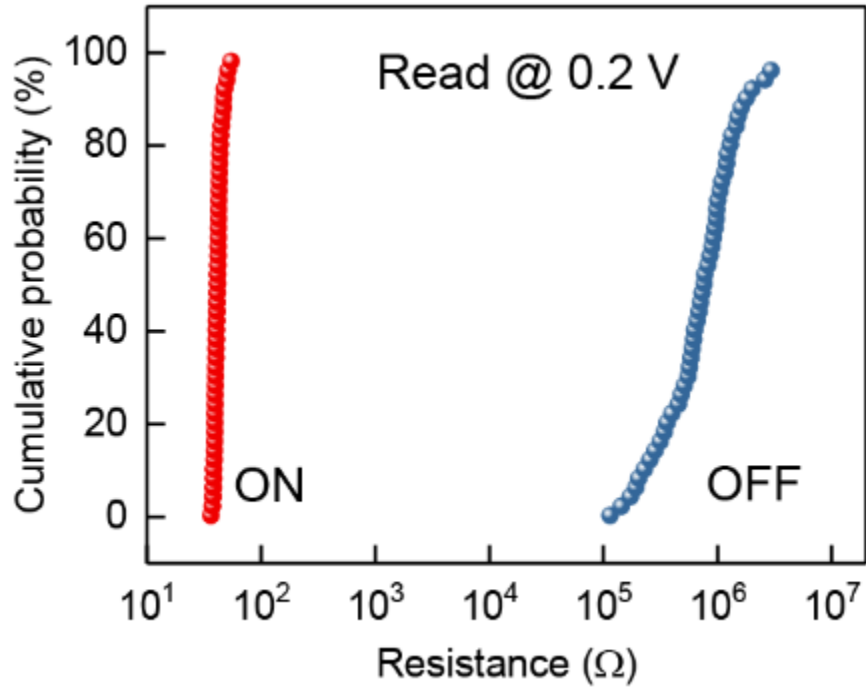

**Figure S2** the cumulative resistance probability presents a centralized resistance distribution of LRS ( $35\sim 55 \Omega$ ) and HRS ( $1.1 \times 10^5 \sim 5.0 \times 10^6 \Omega$ ) with a reliable  $10^3$  ON/OFF ratio.

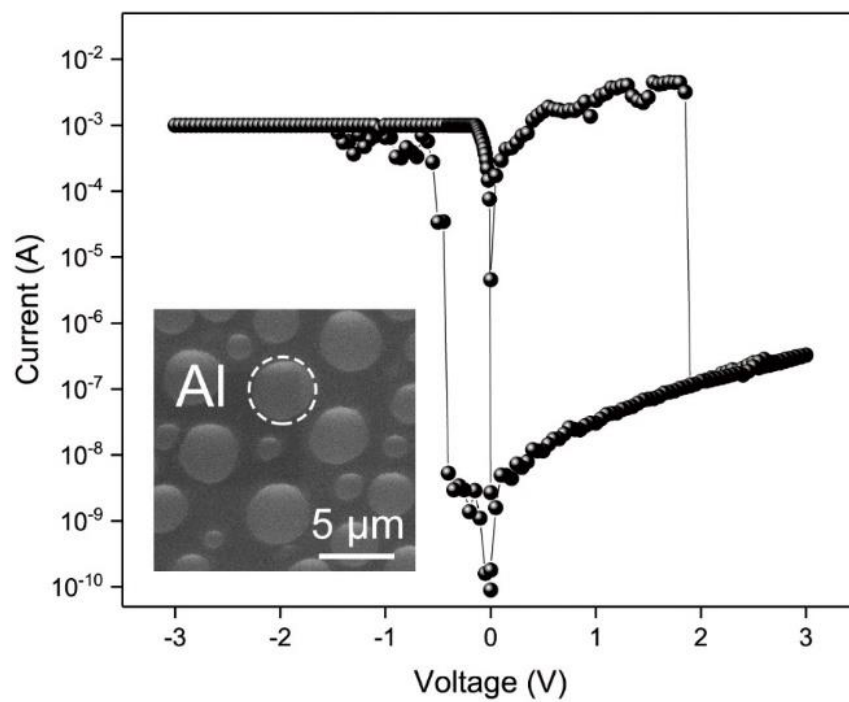

**Figure S3** The  $I$ - $V$  switching behavior of the micro-device with top electrode Al (diameter  $\sim 5 \mu\text{m}$ ) by using an electric probe (diameter of probe tip  $\sim 1 \mu\text{m}$ )

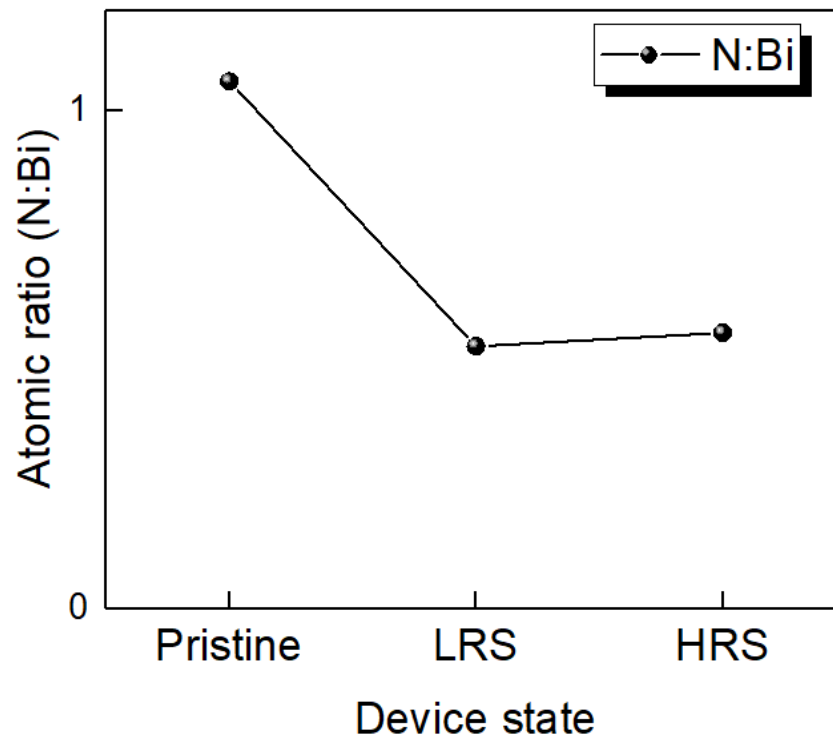

**Figure S4** The atomic ratio of N: Bi for BiON in pristine state, LRS and HRS, respectively.

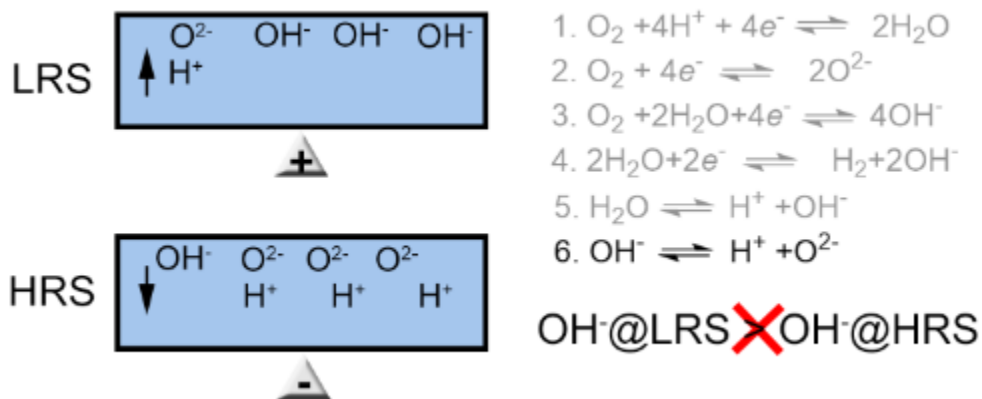

**Figure S5.** The schematic illustration of proton migration model. Reaction (1-5) could hardly occur since almost no water and oxygen can be observed in LRS and HRS (based on the result of XPS). Thus, the proton-induced  $OH^-$  content change should depend on Reaction (6). For example, an upward electric field to simulate LRS, the  $H^+$  migrate to top surface of the film and combine with  $O^{2-}$  to form more  $OH^-$ , leading to a higher  $OH^-$  content on the surface, i.e.  $OH^-@LRS > OH^-@HRS$ , which is contrary to XPS results (Table S1). In summary, the  $OH^-$  species was considered as the main mobile species rather than  $H^+$ .

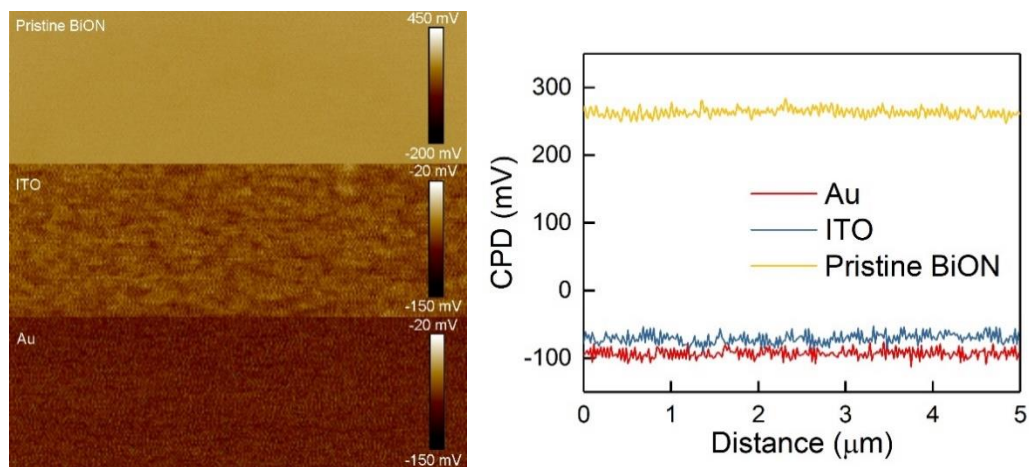

**Figure S6.** The work functions of the Au ( $\phi_{\text{Au}} = 5.1$  eV for calibration), bare ITO and pristine BiON film are measured by KPFM, the CPD values of which are about -90 mV, -70 mV and 260 mV, respectively.  $\phi_{\text{ITO}} = 5.1 - (-0.09) + (-0.07) = 5.12$  eV,  $\phi_{\text{BiON}} = 5.1 - (-0.09) + 0.26 = 5.45$  eV.

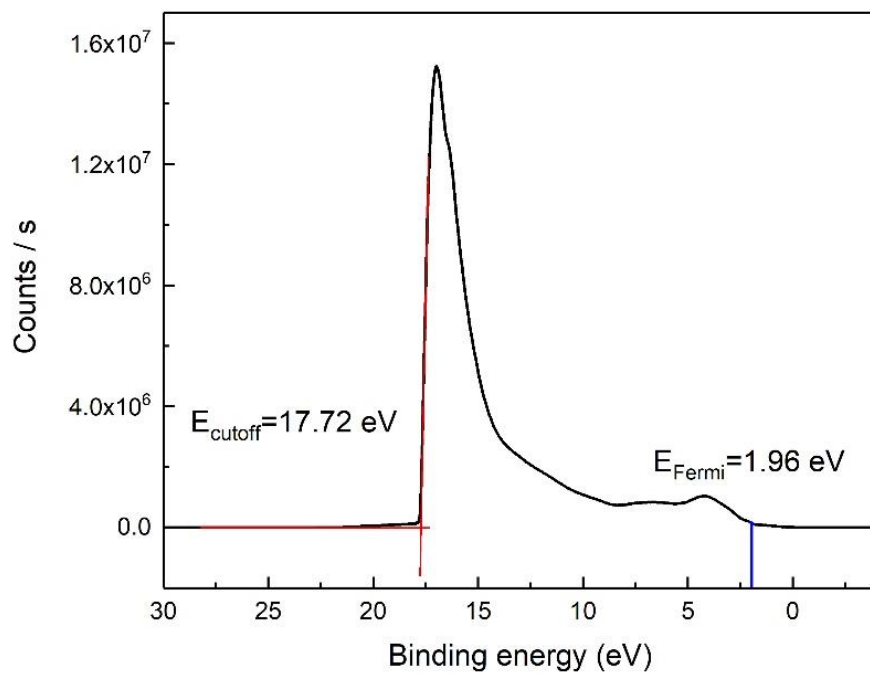

**Figure S7.** The ultraviolet photoelectron spectroscopy (UPS) of BiON nanocrystal, the work function  $\phi_{\text{BiON}} = h\nu - (E_{\text{Cutoff}} - E_{\text{F}})$ ,  $\phi_{\text{BiON}} = 21.2 \text{ eV} - (17.72 \text{ eV} - 1.96 \text{ eV}) = 5.44 \text{ eV}$



**Table S1** the peak fitting of high resolution XPS of O1s

| O1s | Peak                         | Position<br>(eV) | Area     | Area ratio                                    |                                                |
|-----|------------------------------|------------------|----------|-----------------------------------------------|------------------------------------------------|
|     |                              |                  |          | OH <sup>-</sup> /NO <sub>3</sub> <sup>-</sup> | O <sup>2-</sup> / NO <sub>3</sub> <sup>-</sup> |
| LRS | NO <sub>3</sub> <sup>-</sup> | 531.66           | 42260.48 |                                               |                                                |
|     | OH <sup>-</sup>              | 530.02           | 21471.41 |                                               |                                                |
|     | O <sup>2-</sup>              | 529.0            | 14570.04 | 0.51                                          | 0.34                                           |
| HRS | NO <sub>3</sub> <sup>-</sup> | 531.96           | 38180.73 |                                               |                                                |
|     | OH <sup>-</sup>              | 530.11           | 31916.05 |                                               |                                                |
|     | O <sup>2-</sup>              | 529.31           | 11178.29 | 0.84                                          | 0.30                                           |

**Table S2** XPS peaks identification and corresponding components in different depths of the device at LRS

| Etching depth | Peaks identification              | Corresponding components    | Description                          |
|---------------|-----------------------------------|-----------------------------|--------------------------------------|
| <b>L1</b>     | O1s, Al2s, Al2p                   | AlO <sub>x</sub> , Al       | Top electrode with surface oxidation |
| <b>L2</b>     | Al2s, Al2p                        | Al                          | Top electrode                        |
| <b>L3</b>     | O1s, Bi4d, Bi4f, Al2s, Al2p       | Al, AlO <sub>x</sub> , BiON | Al/BiON interface                    |
| <b>L4</b>     | O1s, Bi4d, Bi4f                   | BiON                        | BiON film                            |
| <b>L5</b>     | O1s, Sn3d, In3d, Bi4d(weak), Bi4f | BiON, ITO                   | BiON/ITO interface                   |
| <b>L6</b>     | O1s, Sn3d, In3d                   | ITO                         | Bottom electrode                     |
